# Supplementary material for: Rapid generation of gene-targeted EPS-derived mouse models through tetraploid complementation
Source: PubMed Central journal article supplement (PMC6321812; doi:10.1007/s13238-018-0556-1), 2018-06-13

**Fig S1.** Representative images showing immunostaining of differentiated EPS cells by EB assay. EB was immunostained by anti-FOXA2, anti- $\beta$ -III TUBULIN, anti-GATA3, anti-EOMES and anti-CDX2 antibodies.

**Fig S2.** The generation of *IL6* knock-in EPS cells. Diagrams of the generation human *IL6* gene knock-in EPS cells. Primers for knock-in detection are indicated as pairs of arrows.

**Fig S3. (A)** Off-target effects of human *IL3* knock-in EPS cells. Left, T7E1 assay. Right, sequencing (20 clones per sample). **(B)** Off-target effects of human *IL6* knock-in EPS cells. Left, T7E1 assay. Right, sequencing (20 clones per sample).

**Fig S4.** Representative images showing immunostaining of EPS and EPS-*IL3* with lineage-specific markers. Error bar, 25  $\mu$ m.

**Fig S5.** ES-IL3 cells cultured in 2i condition were generated using the same gene targeting strategy with EPS-IL3 cells. Two ES-IL3 sub-lines were selected for tetraploid complementation experiments at passage 20. 46 blastocysts were injected with ES-IL3 cells and surrogate mothers were sacrificed on day E10.5. (A) Placenta obtained from tetraploid assay using ES-IL3 cells, E10.5. (B) The development of EPS-IL3 and ES-IL3 cells in tetraploid blastocysts.

Fig. S1

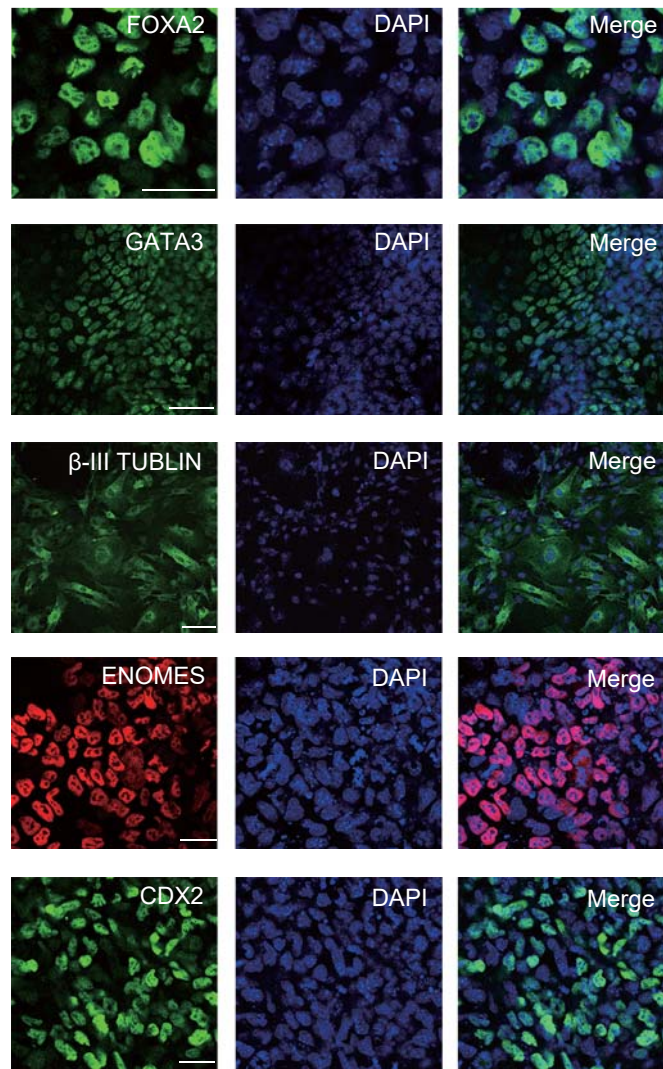

Fig. S2

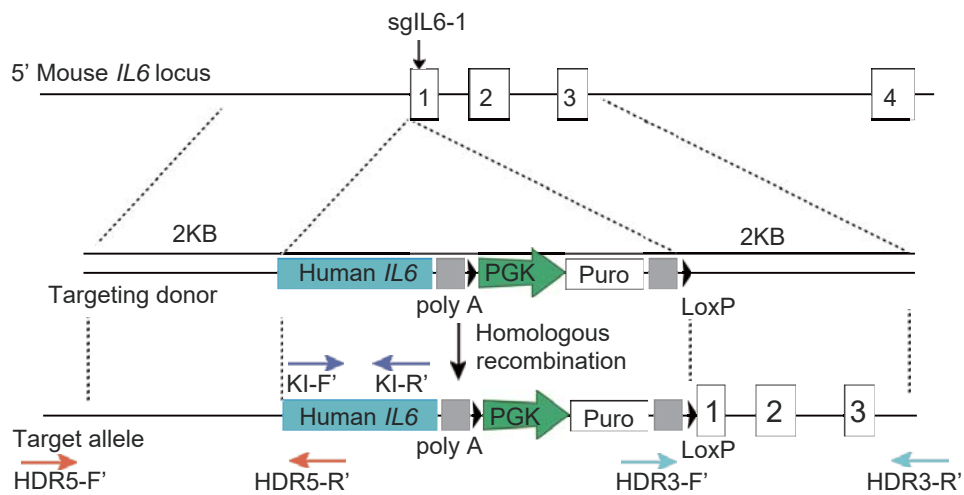



Fig. S4

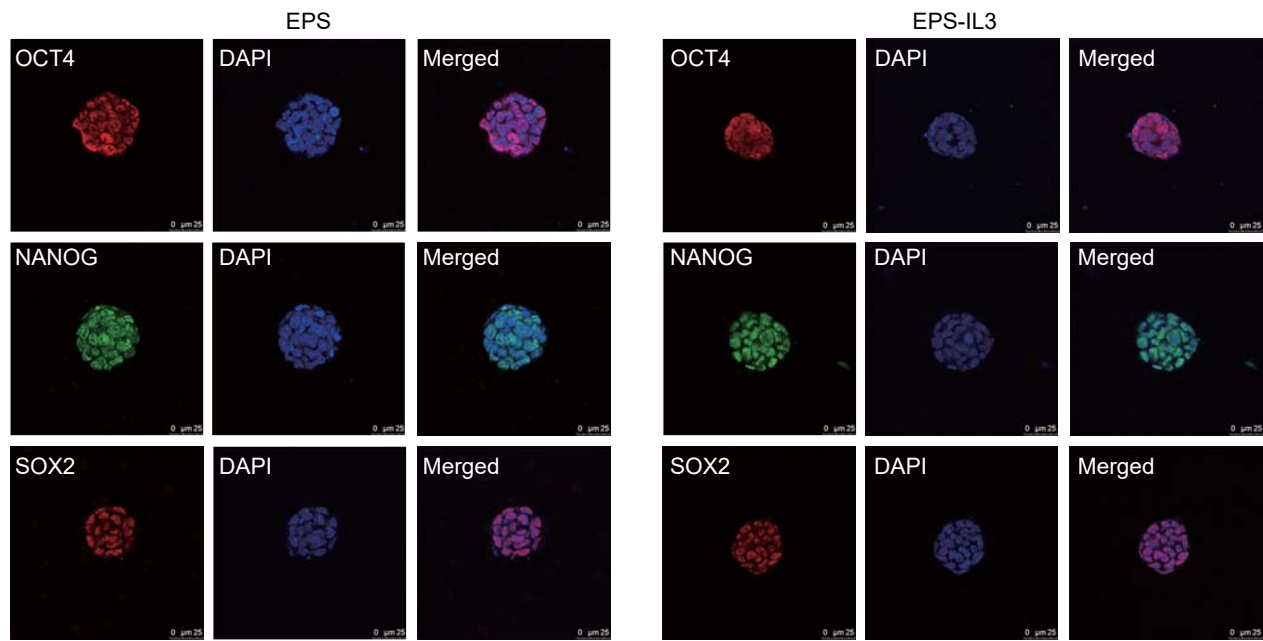

Fig. S5

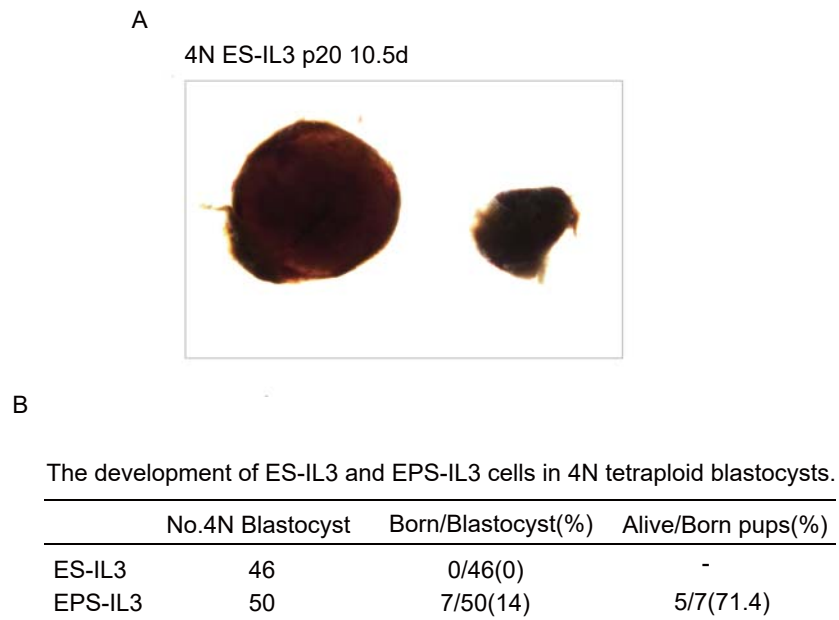

Supplement: 13238_2018_556_MOESM1_ESM.pdf [file 13238_2018_556_MOESM1_ESM.pdf]
